# Supplementary material
Source: PubMed Central journal article supplement (PMC3947242)
Supplement: NIHMS535748-supplement-01.pdf [file NIHMS535748-supplement-01.pdf]

**Supplementary Table 1.** Odds Ratios (OR) and 95% Confidence Intervals (95%CI) of Associations between Sleep Duration and Cardiometabolic Disease Outcomes, Stratified by Race/Ethnicity for Outcomes with Significant Interactions

|                                | <u>Very Short Sleep</u> |          | <u>Short Sleep</u> |          | <u>Long Sleep</u>  |          |
|--------------------------------|-------------------------|----------|--------------------|----------|--------------------|----------|
|                                | <u>OR (95% CI)</u>      | <u>p</u> | <u>OR (95% CI)</u> | <u>p</u> | <u>OR (95% CI)</u> | <u>p</u> |
| <b>NON-HISPANIC WHITE</b>      |                         |          |                    |          |                    |          |
| Hypertension (Self-Reported)   | 1.91 (1.18, 3.09)       | 0.0089   | 1.21 (0.96, 1.52)  | 0.1020   | 1.22 (0.83, 1.80)  | 0.3156   |
| Hypertension (Objective)       | 1.31 (0.80, 2.12)       | 0.2807   | 1.18 (0.94, 1.50)  | 0.1553   | 1.16 (0.77, 1.75)  | 0.4799   |
| Hyperlipidemia (Self-Reported) | 2.10 (1.33, 3.32)       | 0.0015   | 1.06 (0.85, 1.33)  | 0.6102   | 1.40 (0.96, 2.04)  | 0.0835   |
| Hyperlipidemia (Objective)     | 1.62 (1.03, 2.54)       | 0.0353   | 1.05 (0.85, 1.30)  | 0.6579   | 1.55 (1.07, 2.25)  | 0.0198   |
| Diabetes (Self-Reported)       | 2.40 (1.27, 4.52)       | 0.0069   | 1.24 (0.90, 1.71)  | 0.1875   | 1.23 (0.72, 2.10)  | 0.4475   |
| Diabetes (Objective)           | 2.00 (0.99, 4.01)       | 0.0521   | 1.23 (0.88, 1.72)  | 0.2170   | 1.33 (0.76, 2.33)  | 0.3259   |
| Obesity (Self-Reported)        | 1.17 (0.73, 1.88)       | 0.5089   | 1.20 (0.96, 1.50)  | 0.1048   | 0.76 (0.50, 1.16)  | 0.2117   |
| Obesity (Objective)            | 1.50 (0.96, 2.33)       | 0.0748   | 1.17 (0.94, 1.45)  | 0.1628   | 0.84 (0.58, 1.24)  | 0.3848   |
| <b>BLACK/AFRICAN-AMERICAN</b>  |                         |          |                    |          |                    |          |
| Hypertension (Self-Reported)   | 2.12 (1.25, 3.61)       | 0.0054   | 1.01 (0.72, 1.41)  | 0.9653   | 0.61 (0.30, 1.25)  | 0.1767   |
| Hypertension (Objective)       | 1.30 (0.79, 2.15)       | 0.3055   | 1.18 (0.84, 1.64)  | 0.3379   | 0.81 (0.41, 1.59)  | 0.5359   |
| Hyperlipidemia (Self-Reported) | 1.54 (0.93, 2.55)       | 0.0964   | 1.08 (0.77, 1.51)  | 0.6735   | 0.86 (0.46, 1.62)  | 0.6410   |
| Hyperlipidemia (Objective)     | 0.95 (0.60, 1.51)       | 0.8199   | 0.83 (0.61, 1.14)  | 0.2485   | 0.79 (0.43, 1.45)  | 0.4456   |
| Diabetes (Self-Reported)       | 1.11 (0.63, 1.97)       | 0.7090   | 0.73 (0.49, 1.08)  | 0.1187   | 0.70 (0.37, 1.34)  | 0.2834   |
| Diabetes (Objective)           | 1.05 (0.57, 1.93)       | 0.8718   | 1.01 (0.67, 1.52)  | 0.9537   | 0.91 (0.45, 1.84)  | 0.8013   |
| Obesity (Self-Reported)        | 1.91 (1.20, 3.05)       | 0.0067   | 1.15 (0.86, 1.53)  | 0.3623   | 0.82 (0.46, 1.48)  | 0.5172   |
| Obesity (Objective)            | 2.14 (1.34, 3.42)       | 0.0015   | 1.31 (0.98, 1.76)  | 0.0659   | 0.65 (0.36, 1.16)  | 0.1425   |
| <b>MEXICAN-AMERICAN</b>        |                         |          |                    |          |                    |          |
| Hypertension (Self-Reported)   | 1.13 (0.41, 3.13)       | 0.8103   | 1.93 (1.25, 2.96)  | 0.0027   | 1.43 (0.68, 3.04)  | 0.3469   |
| Hypertension (Objective)       | 1.99 (0.59, 6.75)       | 0.2695   | 1.31 (0.88, 1.95)  | 0.1849   | 0.98 (0.47, 2.06)  | 0.9602   |
| Hyperlipidemia (Self-Reported) | 0.89 (0.34, 2.35)       | 0.8134   | 1.02 (0.68, 1.55)  | 0.9117   | 0.41 (0.20, 0.85)  | 0.0159   |
| Hyperlipidemia (Objective)     | 0.59 (0.22, 1.59)       | 0.2989   | 0.80 (0.54, 1.17)  | 0.2514   | 0.71 (0.36, 1.38)  | 0.3080   |
| Diabetes (Self-Reported)       | 1.07 (0.23, 5.12)       | 0.9282   | 0.95 (0.56, 1.60)  | 0.8328   | 1.98 (0.90, 4.37)  | 0.0897   |
| Diabetes (Objective)           | 1.92 (0.54, 6.81)       | 0.3119   | 1.28 (0.75, 2.18)  | 0.3608   | 2.07 (0.99, 4.34)  | 0.0529   |
| Obesity (Self-Reported)        | 1.28 (0.55, 2.99)       | 0.5628   | 1.45 (1.04, 2.04)  | 0.0295   | 1.29 (0.72, 2.30)  | 0.3956   |
| Obesity (Objective)            | 1.17 (0.50, 2.74)       | 0.7202   | 1.14 (0.82, 1.60)  | 0.4301   | 1.10 (0.62, 1.95)  | 0.7465   |
| <b>OTHER HISPANIC/LATINO</b>   |                         |          |                    |          |                    |          |
| Hypertension (Self-Reported)   | 3.53 (1.50, 8.29)       | 0.0039   | 0.96 (0.58, 1.60)  | 0.8792   | 1.95 (0.71, 5.33)  | 0.1958   |
| Hypertension (Objective)       | 2.86 (1.21, 6.73)       | 0.0163   | 1.42 (0.87, 2.34)  | 0.1634   | 1.62 (0.51, 5.09)  | 0.4104   |
| Hyperlipidemia (Self-Reported) | 0.90 (0.39, 2.08)       | 0.8037   | 1.12 (0.69, 1.81)  | 0.6487   | 1.54 (0.64, 3.70)  | 0.3379   |
| Hyperlipidemia (Objective)     | 0.80 (0.36, 1.79)       | 0.5835   | 0.93 (0.59, 1.47)  | 0.7551   | 0.44 (0.15, 1.26)  | 0.1255   |
| Diabetes (Self-Reported)       | 0.64 (0.24, 1.72)       | 0.3754   | 0.79 (0.41, 1.55)  | 0.4988   | 1.03 (0.34, 3.07)  | 0.9616   |
| Diabetes (Objective)           | 0.98 (0.30, 3.26)       | 0.9769   | 0.45 (0.23, 0.89)  | 0.0222   | 1.33 (0.43, 4.08)  | 0.6182   |
| Obesity (Self-Reported)        | 1.41 (0.68, 2.92)       | 0.3560   | 1.26 (0.82, 1.93)  | 0.2964   | 1.72 (0.77, 3.82)  | 0.1859   |
| Obesity (Objective)            | 1.38 (0.67, 2.86)       | 0.3812   | 1.36 (0.89, 2.09)  | 0.1545   | 1.71 (0.77, 3.77)  | 0.1844   |
| <b>ASIAN/OTHER</b>             |                         |          |                    |          |                    |          |
| Hypertension (Self-Reported)   | 2.09 (0.59, 7.42)       | 0.2559   | 1.54 (0.59, 3.99)  | 0.3740   | 1.71 (0.41, 7.17)  | 0.4620   |
| Hypertension (Objective)       | 0.89 (0.26, 3.02)       | 0.8511   | 1.02 (0.43, 2.44)  | 0.9632   | 1.87 (0.39, 9.07)  | 0.4356   |
| Hyperlipidemia (Self-Reported) | 11.50 (2.30, 59.10)     | 0.0033   | 1.10 (0.50, 2.70)  | 0.8164   | 1.40 (0.30, 7.30)  | 0.6847   |
| Hyperlipidemia (Objective)     | 3.74 (1.16, 12.03)      | 0.0271   | 1.14 (0.50, 2.58)  | 0.7604   | 1.13 (0.24, 5.34)  | 0.8805   |
| Diabetes (Self-Reported)       | 0.79 (0.10, 6.06)       | 0.8188   | 0.47 (0.11, 2.01)  | 0.3061   | 1.28 (0.19, 8.40)  | 0.7997   |
| Diabetes (Objective)           | 0.57 (0.08, 4.02)       | 0.5738   | 0.34 (0.07, 1.60)  | 0.1730   | 0.94 (0.160, 5.58) | 0.9461   |

|                         |                   |        |                   |        |                   |        |
|-------------------------|-------------------|--------|-------------------|--------|-------------------|--------|
| Obesity (Self-Reported) | 0.96 (0.23, 3.99) | 0.9502 | 1.45 (0.58, 3.67) | 0.4300 | 0.75 (0.11, 5.08) | 0.7706 |
| Obesity (Objective)     | 1.39 (0.27, 7.04) | 0.6915 | 1.20 (0.43, 3.33) | 0.7253 | 0.15 (0.01, 3.49) | 0.2404 |
