# Supplementary material
Source: PubMed Central journal article supplement (PMC3947242)

**Supplementary Figure 1.** Associations between Sleep Duration and Cardiometabolic Risk Factors, Stratified by Race/Ethnicity. Odds Ratios and 95% Confidence Intervals are displayed.

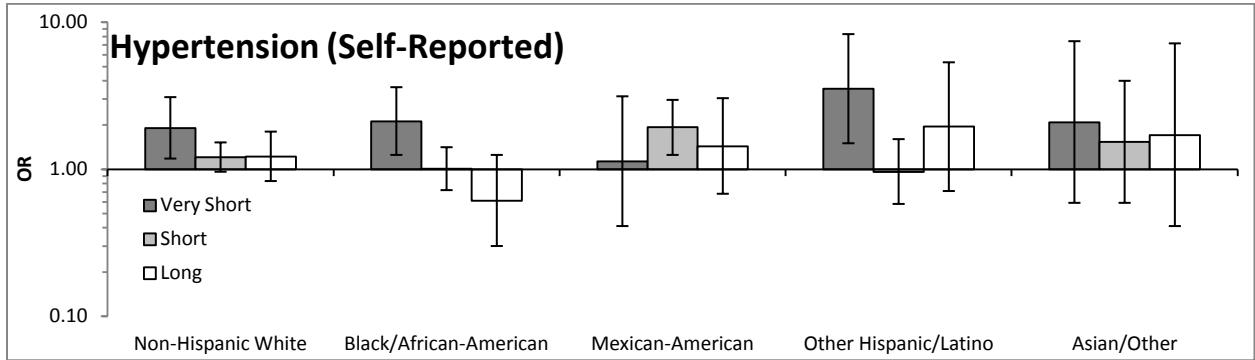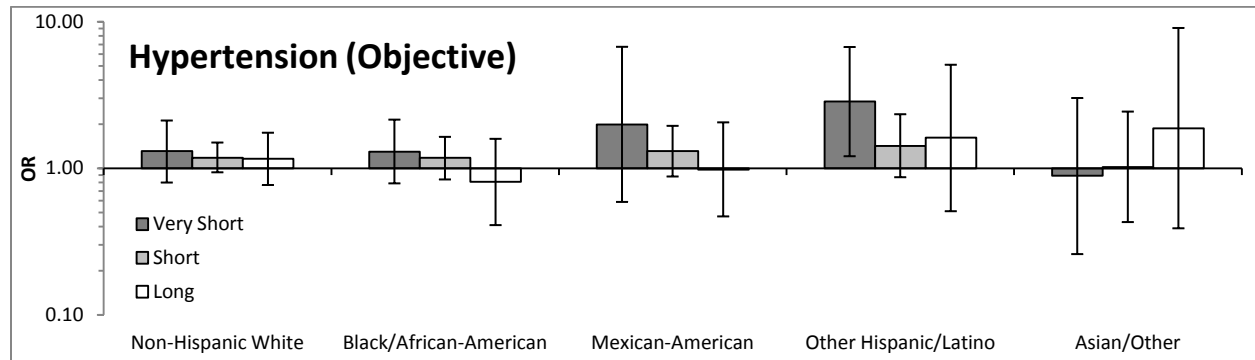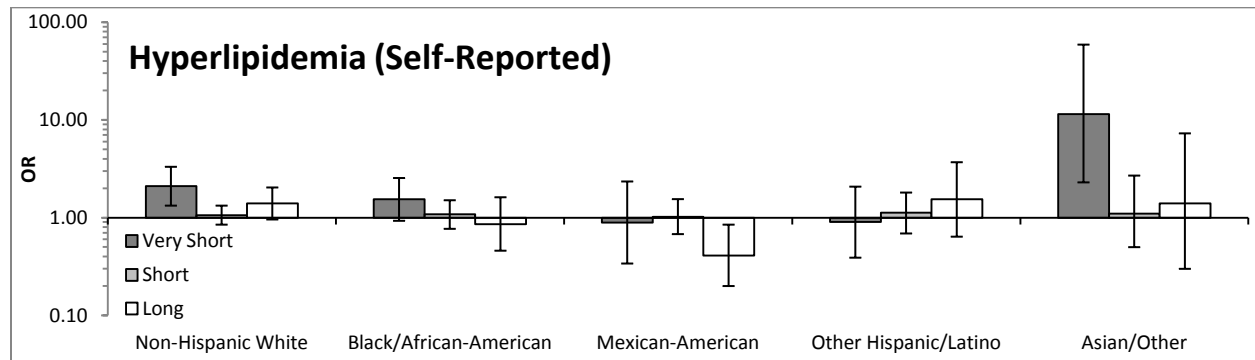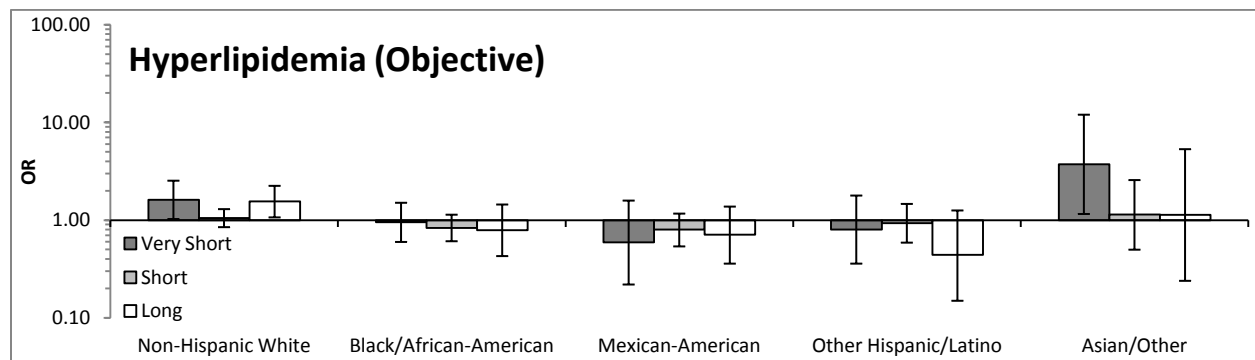

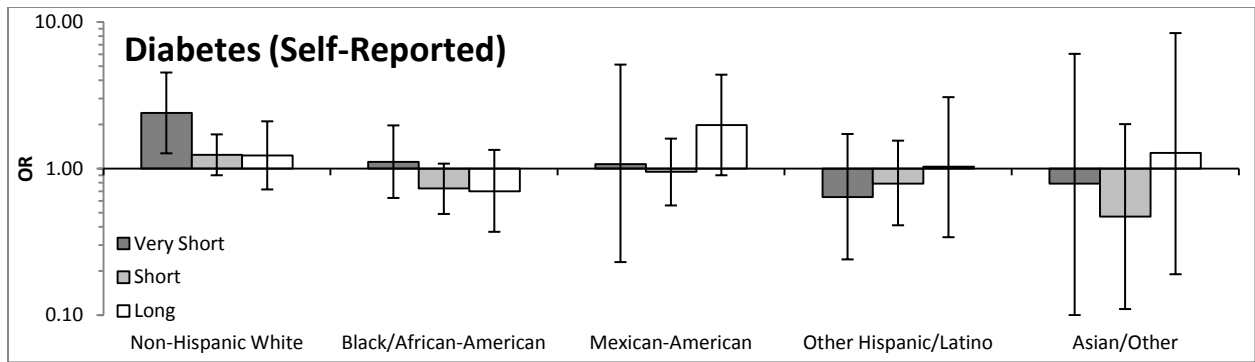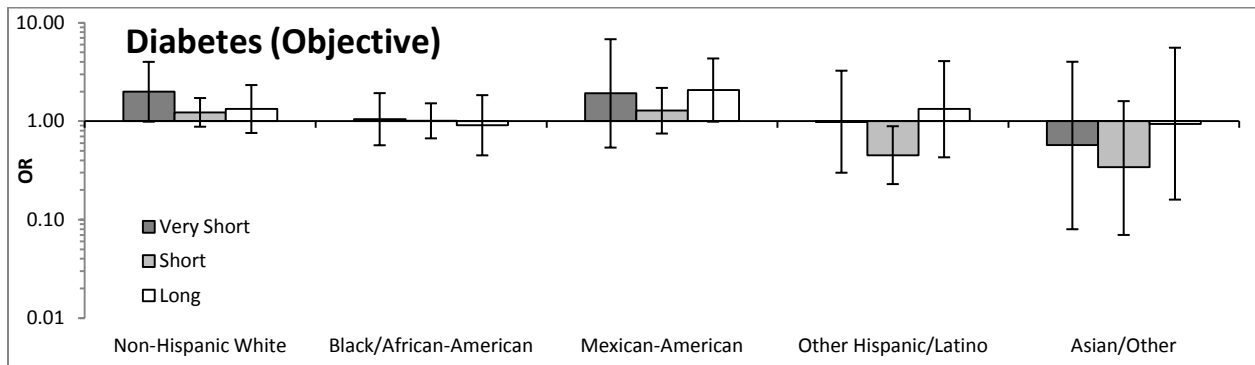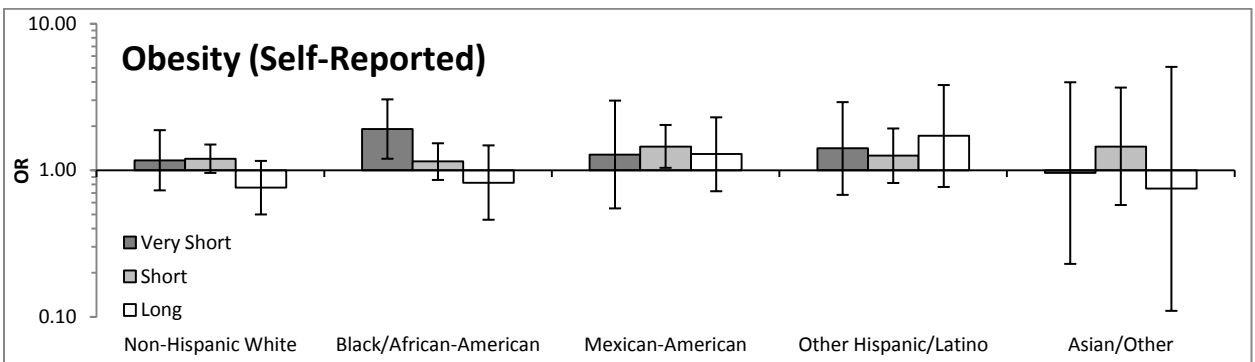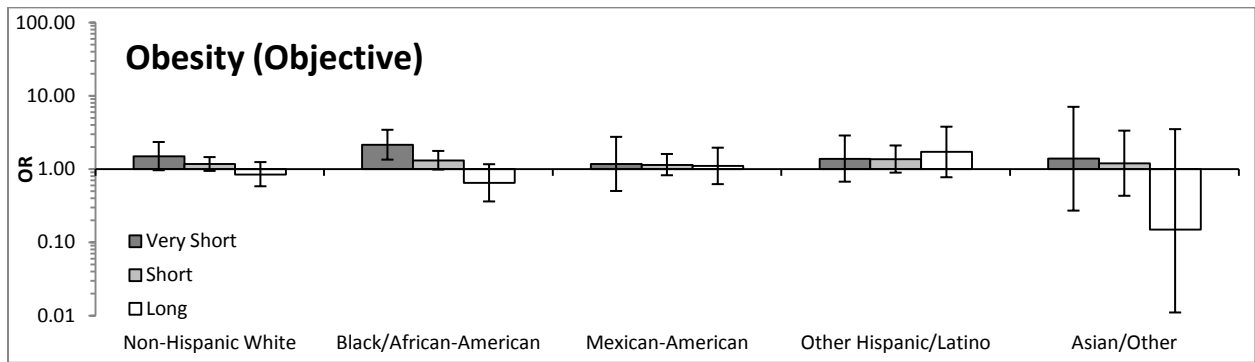

Supplement: NIHMS535748-supplement-02.pdf [file NIHMS535748-supplement-02.pdf]
